# Supplementary material for: Novel Cancer Stem Marker and Its Applicability for Grading Primary Human Gliomas
Source: PubMed Central journal article supplement — Technol Cancer Res Treat. 2018 Jan 28;17:1533034617753812. doi: 10.1177/1533034617753812 (PMC5789816; doi:10.1177/1533034617753812), 2018-01-28
Supplement: Supplementary.pdf [file Supplementary.pdf]

## Supplementary

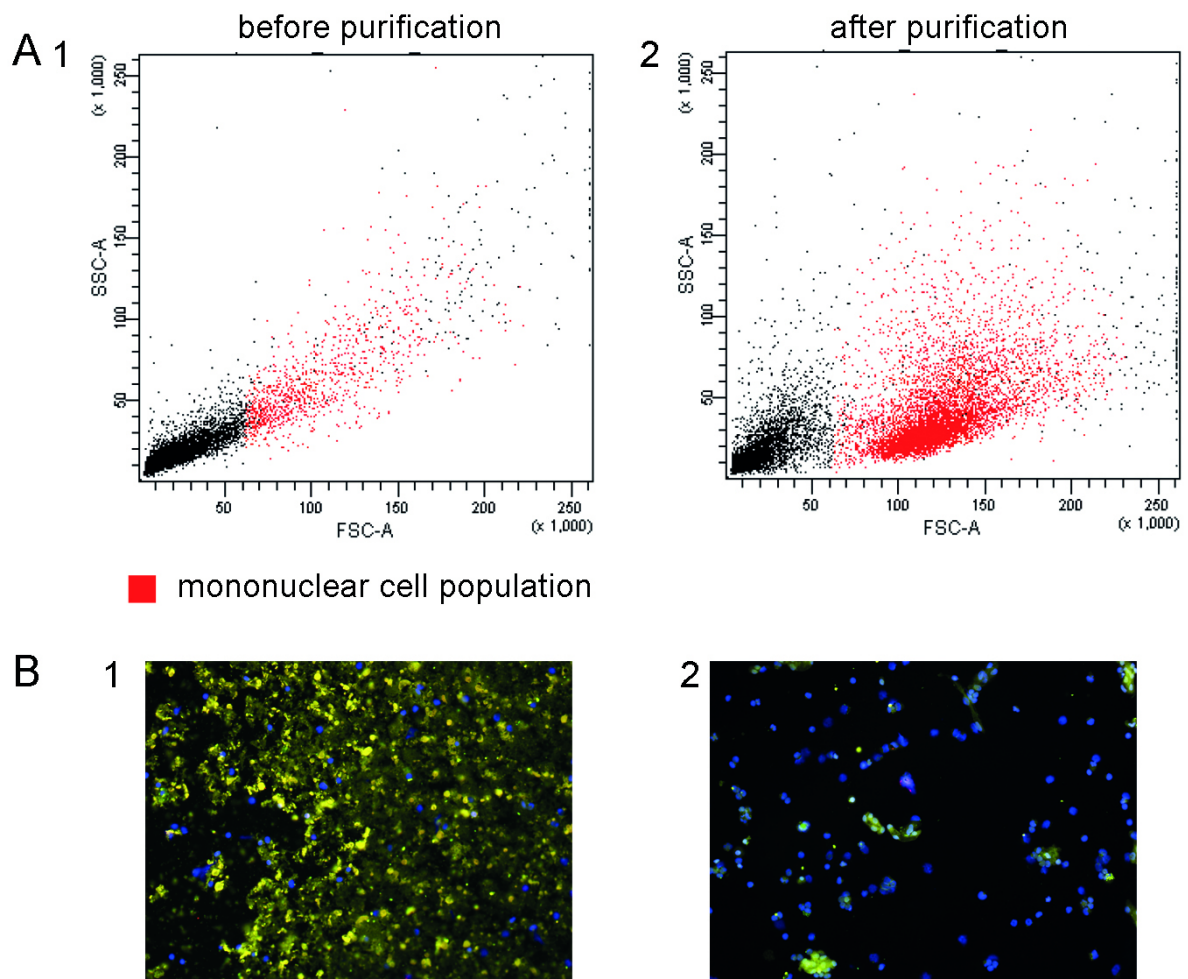

**Supp. Fig. 1.** Analysis of glioma cell purification efficiency using percoll density gradient. **A** – FACS profiles of cell suspensions before and after purification (FSC/SSC plots). After purification (**2**), mononuclear cell population constituting less than 10% of the starting material (**1**) appears. **B** – microscopy analysis of cell suspensions before (**1**) and after (**2**) purification. Merged DAPI+FITC channel images are shown to indicate cell positions (blue, chromatin) and contaminating autofluorescent cell debris (green). Significant, although incomplete, cell purification is achieved.

**Supp. Table 1.** Percentage of TAMRA+ and CD133+ cells in freshly isolated tumor samples, as well as in the primary cell cultures established from resection material.

| Patient # | Grade | Tumor samples |        | Passage <sub>1</sub><br>(primary cell culture) |                  | Passage <sub>2</sub> |               |
|-----------|-------|---------------|--------|------------------------------------------------|------------------|----------------------|---------------|
|           |       | CD133+        | TAMRA+ | CD133+                                         | TAMRA+           | CD133+               | TAMRA+        |
| 1         | IV    | -             | 0.30   | 0.05<br>(day 28)                               |                  |                      |               |
| 2         | IV    | -             | 1.60   | 1.15<br>(day 7)                                |                  |                      |               |
| 3         | IV    | 0.13          | 2.90   | 0.08<br>(day 7)                                |                  | 0.13<br>(day 23)     |               |
| 4         | IV    | -             | 3.10   |                                                |                  |                      |               |
| 5         | met   | 4.71          | 11.60  | 1.52<br>(day 6)                                |                  |                      |               |
| 6         | III   | 0.17          | 0.30   |                                                |                  |                      |               |
| 7*        | III   | 0.37          | 0.68   |                                                |                  |                      |               |
| 8         | IV    | -             | 1.90   |                                                |                  |                      |               |
| 9         | IV    | -             | 0.60   |                                                |                  |                      |               |
| 10*       | III   | -             | 1.50   |                                                |                  |                      |               |
| 11        | III   | -             | 2.80   |                                                |                  |                      |               |
| 12        | IV    | -             | 0.36   |                                                |                  |                      |               |
| 13        | III   | -             | 0.88   |                                                |                  |                      |               |
| 14        | IV    | -             | 0.32   |                                                |                  |                      |               |
| 15        | III   | 2.28          | 3.26   | 0<br>(day 21)                                  | 0<br>(day 21)    | 0<br>(day 63)        | 0<br>(day 63) |
| 16*       | IV    | 0             | 4.00   |                                                |                  |                      |               |
| 17        | III   | 0             | 1.90   | 0<br>(day 28)                                  | 0<br>(day 28)    |                      |               |
| 18        | IV    | 0.06          | 6.60   | 0<br>(day 23)                                  | 0<br>(day 23)    |                      | 0<br>(day 87) |
| 19        | III   | 42.50         | 4.00   |                                                |                  |                      |               |
| 20        | II    | 0.23          | 0      | 0.18<br>(day 27)                               | 0.50<br>(day 27) | 0<br>(day 48)        | 0<br>(day 48) |

|     |        |       |      |                   |                  |                  |                                   |
|-----|--------|-------|------|-------------------|------------------|------------------|-----------------------------------|
| 21  | IV     | 17.36 | 0.30 | 29.18<br>(day 9)  | 0.59<br>(day 9)  |                  | 0 (glia)<br>(day 42)              |
|     |        |       |      |                   |                  |                  | ~10<br>(neurospheres)<br>(day 42) |
| 22  | IV     | 2.80  | 0.40 | 1.97<br>(day 14)  | 2.10<br>(day 14) | 3.71<br>(day 49) | 0<br>(day 49)                     |
| 23  | IV     | -     | 1.90 | 0.21<br>(day 22)  | 0<br>(day 22)    | 0.43<br>(day 43) | 0.09<br>(day 43)                  |
| 24  | IV     | 0.13  | 0.10 | 0<br>(day 31)     | 0<br>(day 31)    | 0<br>(day 56)    | 0<br>(day 56)                     |
| 25* | IV     | 1.73  | 0.91 |                   | 0.08<br>(day 45) |                  |                                   |
| 26  | II-III | -     | 0    |                   |                  |                  |                                   |
| 27* | IV     | 4.75  | 1.30 |                   |                  |                  |                                   |
| 28  | II-III | -     | 0.05 |                   |                  |                  |                                   |
| 29  | IV     | 5.15  | 1.11 | 2.22<br>(day 37)  |                  |                  |                                   |
| 30* | IV     | 5.86  | 2.02 |                   |                  |                  |                                   |
| 31  | IV     | 0     | 1.75 | 0<br>(day 14)     | 0<br>(day 14)    |                  |                                   |
| 32  | IV     | 2.92  | 1.02 |                   |                  |                  |                                   |
| 33  | II-III | -     | 0.32 |                   |                  |                  |                                   |
| 34  | II-III | 0.20  | 0.22 |                   |                  |                  |                                   |
| 35* | IV     | 0.34  | 0    |                   |                  |                  |                                   |
| 36* | IV     | 0     | 0    |                   |                  |                  |                                   |
| 37  | IV     | -     | -    | 0.72<br>(day 27)  | 0<br>(27 сутки)  |                  |                                   |
| 38  | I      | 0.50  | 0.10 |                   |                  |                  |                                   |
| 39* | III    | 0.98  | 0.17 | 0<br>(day 40)     | 0.45<br>(day 40) | 0.85<br>(day 76) | 1.30<br>(day 76)                  |
| 40* | IV     | 0     | -    | 2.09<br>(day 25)  | 0.36<br>(day 25) |                  |                                   |
| 41  | IV     | 40.30 | 4.00 | 32.40<br>(day 43) | 0<br>(day 43)    |                  |                                   |
| 42* | IV     | 0.43  | 0.10 | 0<br>(day 36)     | 0.50<br>(day 36) |                  |                                   |
| 43  | IV     | 0.53  | 1.70 | 0<br>(day 30)     | 2.80<br>(day 30) |                  |                                   |

|    |        |      |      |  |  |  |  |
|----|--------|------|------|--|--|--|--|
| 44 | IV     | 0.92 | 0.92 |  |  |  |  |
| 45 | III    | -    | 6.70 |  |  |  |  |
| 46 | II-III | -    | 0.89 |  |  |  |  |
| 47 | II     | 0.80 | 0.60 |  |  |  |  |
| 48 | II     | -    | 0.99 |  |  |  |  |
| 49 | IV     | 0.44 | -    |  |  |  |  |
| 50 | IV     | 0    | -    |  |  |  |  |
| 51 | III    | 2.32 | 3.50 |  |  |  |  |

Note: \* – disease relapse; II-III – Grade II progressing into Grade III.
